# Supplementary material for: A Phagocytic Route for Uptake of Double-Stranded RNA in RNAi
Source: PubMed Central journal article supplement (PMC3084738; doi:10.1371/journal.pone.0019087), 2011-04-29

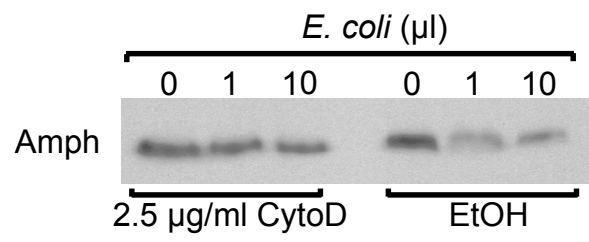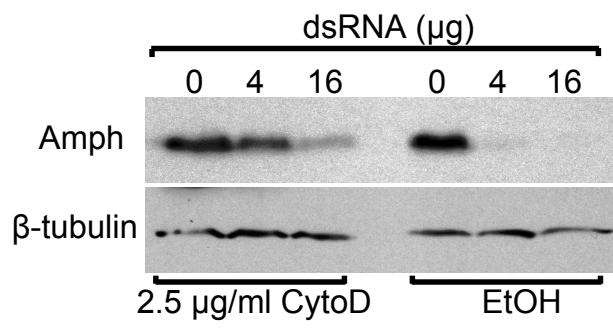

Supplement: pone.0019087.s002.pdf [file pone.0019087.s002.pdf]
